# Supplementary material for: Two-year follow-up of a randomized controlled trial: knowledge and reproductive outcome after online fertility education
Source: PubMed Central journal article supplement — Hum Reprod. 2018 Sep 28;33(11):2035–42. doi: 10.1093/humrep/dey293 (PMC6195802; doi:10.1093/humrep/dey293), 2018-09-28
Supplement: dey293suppl_figure1.pdf [file dey293suppl_figure1.pdf]

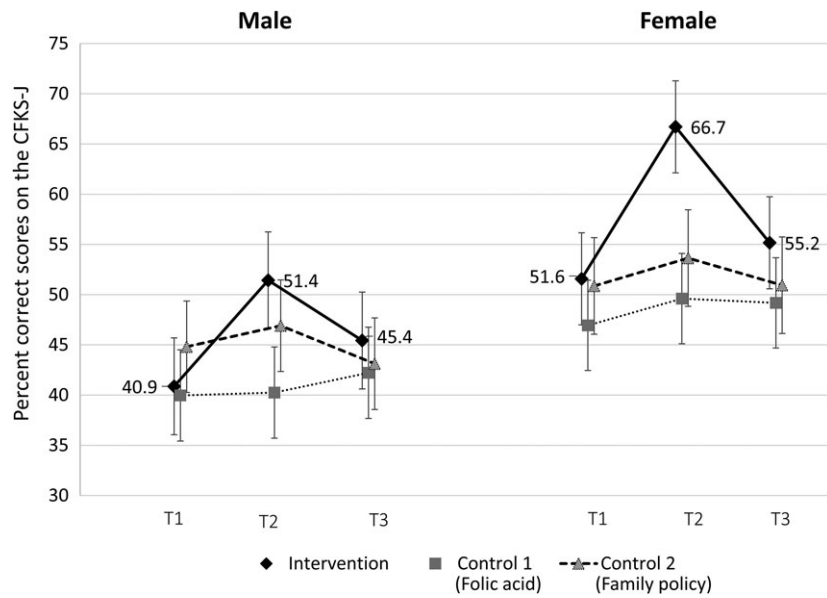

**Supplementary Figure S1** Mean percent correct scores on the Japanese version of the Cardiff Fertility Knowledge Scale (CFKS-J) by group. Error bars represent 95% CI, calculated by repeated-measures analysis of variance. Mean percent correct scores on the CFKS-J of the intervention groups are shown. T1, before exposure to an information brochure; T2, immediately after exposure; T3, 2 years after exposure.
