# Supplementary material for: Two-year follow-up of a randomized controlled trial: knowledge and reproductive outcome after online fertility education
Source: PubMed Central journal article supplement — Hum Reprod. 2018 Sep 28;33(11):2035–42. doi: 10.1093/humrep/dey293 (PMC6195802; doi:10.1093/humrep/dey293), 2018-09-28
Supplement: dey293suppl_table1.pdf [file dey293suppl_table1.pdf]

**Supplementary Table S1** Baseline (T1) characteristics of all T1 participants, those lost to follow-up, and T3 participants.

| T1 characteristics                                               | Male                          |                                             |                           | Female                        |                                             |                           |
|------------------------------------------------------------------|-------------------------------|---------------------------------------------|---------------------------|-------------------------------|---------------------------------------------|---------------------------|
|                                                                  | All T1 participants (n = 726) | T1 participants lost to follow-up (n = 343) | T3 participants (n = 383) | All T1 participants (n = 729) | T1 participants lost to follow-up (n = 369) | T3 participants (n = 360) |
| Demographics                                                     |                               |                                             |                           |                               |                                             |                           |
| Age in years, mean (SD) <sup>a</sup>                             | 30.8 (5.7)                    | 29.4 (5.9)                                  | 32.1 (5.2)**              | 30.4 (5.6)                    | 29.2 (5.7)                                  | 31.6 (5.2)**              |
| University education (n, % yes) <sup>b</sup>                     | 400 (55.1)                    | 160 (46.6)                                  | 240 (62.7)**              | 290 (39.8)                    | 142 (38.5)                                  | 148 (41.1)                |
| Relationship status (n, %) <sup>b</sup>                          |                               |                                             |                           |                               |                                             |                           |
| Single                                                           | 345 (47.5)                    | 167 (48.7)                                  | 178 (46.5)**              | 217 (29.8)                    | 106 (28.7)                                  | 111 (30.8)**              |
| Having partners, not married                                     | 177 (24.4)                    | 98 (28.6)                                   | 79 (20.6)                 | 177 (24.3)                    | 107 (29.0)                                  | 70 (19.4)                 |
| Married                                                          | 204 (28.1)                    | 78 (22.7)                                   | 126 (32.9)                | 335 (46.0)                    | 156 (42.3)                                  | 179 (49.7)                |
| Fertility                                                        |                               |                                             |                           |                               |                                             |                           |
| The number of children (n, %) <sup>c</sup>                       |                               |                                             |                           |                               |                                             |                           |
| None                                                             | 591 (81.4)                    | 290 (84.5)                                  | 301 (78.6)*               | 506 (69.4)                    | 251 (68.0)                                  | 255 (70.8)                |
| One                                                              | 98 (13.5)                     | 39 (11.4)                                   | 59 (15.4)                 | 158 (21.7)                    | 77 (20.9)                                   | 81 (22.5)                 |
| Two or more                                                      | 37 (5.1)                      | 14 (4.1)                                    | 23 (6.0)                  | 65 (8.9)                      | 41 (11.1)                                   | 24 (6.7)                  |
| Prior medical consultation for fertility (n, % yes) <sup>b</sup> | 37 (5.1)                      | 10 (2.9)                                    | 27 (7.0)*                 | 69 (9.5)                      | 23 (6.2)                                    | 46 (12.8)**               |
| Fertility knowledge                                              |                               |                                             |                           |                               |                                             |                           |
| Score on the CFKS-J, mean (SD) <sup>a</sup>                      | 42.5 (24.0)                   | 43.1 (23.5)                                 | 41.9 (24.5)               | 49.5 (23.9)                   | 49.2 (23.3)                                 | 49.7 (24.6)               |

CFKS-J: the Japanese version of the Cardiff Fertility Knowledge Scale.

Statistical tests compare the T3 participants with those lost to follow-up.

Significance was indicated by \* $P < 0.05$  and \*\* $P < 0.01$ .

<sup>a</sup>Two-tailed t test.

<sup>b</sup>Chi-square test.

<sup>c</sup>Wilcoxon-type test for trend.
